# Supplementary material for: Review of the JCAP/JATOP Air Quality Model Study in Japan
Source: MDPI journal article supplement (doi:10.3390/atmos12080943), 2021-07-22
Supplement: s1 [file s1]

### S1 Suspended Particle Matter (SPM) in Japanese air quality regulation

In Japan, Suspended Particulate Matter (SPM) is defined as airborne particles with a diameter smaller than or equal to 10  $\mu\text{m}$ .

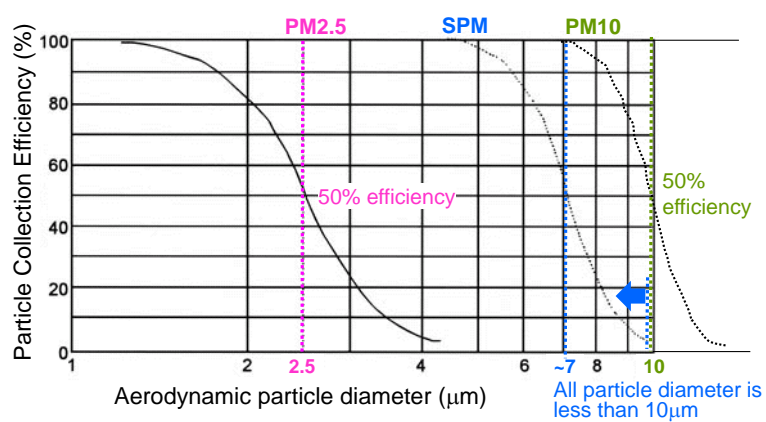

**Figure S1.** Definition of PM<sub>2.5</sub>, SPM and PM<sub>10</sub>

PM<sub>10</sub>(PM<sub>2.5</sub>) is defined as particulate matter with a diameter of 10(2.5) $\mu\text{m}$  collected with 50% efficiency by a PM<sub>10</sub> (PM<sub>2.5</sub>) sampling collection device.

## S2. Vehicle category and emission regulation in Japan

**Table S2.** Vehicle category and emission regulation in Japan\*

| Vehicle Category |          |                              | Calendar Year |      |           |      |           |          |          |      |      |      |                   |                   |                   |      |      |      |      |      |      |      |              |      |      |      |      |      |      |      |      |      |      |      |      |
|------------------|----------|------------------------------|---------------|------|-----------|------|-----------|----------|----------|------|------|------|-------------------|-------------------|-------------------|------|------|------|------|------|------|------|--------------|------|------|------|------|------|------|------|------|------|------|------|------|
| Fuel             | Class    | GVW/Engine Displacement      | 1990          | 1991 | 1992      | 1993 | 1994      | 1995     | 1996     | 1997 | 1998 | 1999 | 2000              | 2001              | 2002              | 2003 | 2004 | 2005 | 2006 | 2007 | 2008 | 2009 | 2010         | 2011 | 2012 | 2013 | 2014 | 2015 | 2016 | 2017 | 2018 | 2019 | 2020 | 2021 | 2022 |
| Gasoline & LPG   | PC       | 660cc < Engine Displacement  | S53           |      |           |      |           |          |          |      |      |      | NST               |                   |                   |      |      |      |      |      |      |      | New-LongTerm |      |      |      |      |      |      |      |      |      | H30  |      |      |
|                  | Mini car | Engine Displacement ≤ 660cc  | S53           |      |           |      |           |          |          |      |      |      | New-ShortTerm     |                   |                   |      |      |      |      |      |      |      | New-LongTerm |      |      |      |      |      |      |      |      |      | H30  |      |      |
|                  | LDT      | GVW ≤ 1700kg                 | S53           |      |           |      |           |          |          |      |      |      | NST               |                   |                   |      |      |      |      |      |      |      | New-LongTerm |      |      |      |      |      |      |      |      |      | H30  |      |      |
|                  | MDT      | 1700kg < GVW ≤ 2500kg        | S53           |      |           |      |           |          |          |      |      |      | NST               |                   |                   |      |      |      |      |      |      |      | New-LongTerm |      |      |      |      |      |      |      |      |      | H30  |      |      |
|                  |          | 2500kg < GVW ≤ 3500kg        | S53           |      |           |      |           |          |          |      |      |      | NST               |                   |                   |      |      |      |      |      |      |      | New-LongTerm |      |      |      |      |      |      |      |      |      | H30  |      |      |
|                  | HDT      | 3500kg < GVW                 | S53           |      |           |      |           |          |          |      |      |      | NST               |                   |                   |      |      |      |      |      |      |      | New-LongTerm |      |      |      |      |      |      |      |      |      |      |      |      |
| Diesel           | PC       | Vehicle Weight < 1265kg      | H2            | H6   |           | ST   |           | LongTerm |          | NST  |      | NLT  |                   | Post-New-LongTerm |                   | H30  |      |      |      |      |      |      |              |      |      |      |      |      |      |      |      |      |      |      |      |
|                  | PC       | 1265kg ≤ Vehicle Weight      | H4            |      | H6        |      | ShortTerm |          | LongTerm |      | NST  |      | NLT               |                   | Post-New-LongTerm |      | H30  |      |      |      |      |      |              |      |      |      |      |      |      |      |      |      |      |      |      |
|                  | LDT      | GVW ≤ 1700kg                 | S63           |      | ShortTerm |      | LongTerm  |          | NST      |      | NLT  |      | Post-New-LongTerm |                   | H30               |      |      |      |      |      |      |      |              |      |      |      |      |      |      |      |      |      |      |      |      |
|                  | MDT      | 1700kg < GVW ≤ 2500kg        | S63           |      | ShortTerm |      | LongTerm  |          | NST      |      | NLT  |      | Post-New-LongTerm |                   | H30               |      |      |      |      |      |      |      |              |      |      |      |      |      |      |      |      |      |      |      |      |
|                  |          | 2500kg < GVW ≤ 3500kg        | S63           |      | ST        |      | LongTerm  |          | NST      |      | NLT  |      | Post-New-LongTerm |                   | H30               |      |      |      |      |      |      |      |              |      |      |      |      |      |      |      |      |      |      |      |      |
|                  | HDT      | 3500kg < GVW ≤ 12000kg       | H1            |      | ShortTerm |      | LongTerm  |          | NST      |      | NLT  |      | Post-New-LongTerm |                   | H28               |      |      |      |      |      |      |      |              |      |      |      |      |      |      |      |      |      |      |      |      |
| Motor cycles     |          | 12000kg < GVW                | H1            |      | ShortTerm |      | LongTerm  |          | NST      |      | NLT  |      | Post-New-LongTerm |                   | H28               |      |      |      |      |      |      |      |              |      |      |      |      |      |      |      |      |      |      |      |      |
|                  | Mini 1   | 1st-class motor-driven cycle | No Regulation |      |           |      |           |          |          |      |      |      | H10               |                   |                   |      |      |      |      |      |      |      | H18          |      |      |      |      |      |      |      |      |      | H28  |      |      |
|                  | Mini 2   | 2nd-class motor-driven cycle | No Regulation |      |           |      |           |          |          |      |      |      | H11               |                   |                   |      |      |      |      |      |      |      | H19          |      |      |      |      |      |      |      |      |      | H28  |      |      |
|                  | Small    | 125cc < Disp 250cc           | No Regulation |      |           |      |           |          |          |      |      |      | H10               |                   |                   |      |      |      |      |      |      |      | H18          |      |      |      |      |      |      |      |      |      | H28  |      |      |
|                  | Middle   | 250cc < Disp.                | No Regulation |      |           |      |           |          |          |      |      |      | H11               |                   |                   |      |      |      |      |      |      |      | H19          |      |      |      |      |      |      |      |      |      | H28  |      |      |

### Vehicle Category

PC: Passenger Car  
LDT: Light Duty Truck  
MDT: Medium Duty Truck  
HDT: Heavy Duty Truck  
GVW: Gross Vehicle Weight  
Disp.: Engine Displacement

### Emission Regulation

S53: 1978 Regulation  
S63: 1988 Regulation  
H1: 1989 Regulation  
H2: 1990 Regulation  
H4: 1992 Regulation  
H6: 1994 Regulation  
H10: 1998 Regulation  
H11: 1999 Regulation  
H18: 2006 Regulation  
H19: 2007 Regulation  
H24: 2012 Regulation  
H28: 2016 Regulation  
H30: 2018 Regulation

ST: Short Term Regulation  
LT: Long Term Regulation  
NST: New Short Term Regulation  
NLT: New Long Term Regulation  
PNLT: Post New Long Term Regulation

\* Ministry of Land, Infrastructure, Transport and Tourism, Exhaust gas regulations for new cars.  
[https://www.mlit.go.jp/jidosha/jidosha\\_tk10\\_000002.html](https://www.mlit.go.jp/jidosha/jidosha_tk10_000002.html) (in Japanese) (accessed on 1 June 2021)

### S3. 103 Vehicle Category for JEI-VEM

**Table S3. 103 Vehicle Category for JEI-VEM**

| No. | Vehicle Type        | Usage    | Fuel Type | Weight Class      | No. of vehicles owned (2010) | No. | Vehicle Type            | Usage    | Fuel Type | Weight Class         | No. of vehicles owned (2010) |
|-----|---------------------|----------|-----------|-------------------|------------------------------|-----|-------------------------|----------|-----------|----------------------|------------------------------|
| 1   | Light Passenger Car | Private  | G         | –                 | 17,482,451                   | 48  | Truck                   | Private  | G         | GVW ≤ 1.7t           | 2,849                        |
| 2   |                     | Business | G         | –                 | 12,377                       | 49  |                         |          |           | 1.7t < GVW ≤ 2.5t    | 28,890                       |
| 3   | Passenger Car       | Private  | G         | –                 | 39,099,930                   | 50  |                         |          |           | 2.5t < GVW ≤ 3.5t    | 77,197                       |
| 4   |                     |          | D         | 1W ≤ 1.25t        | 64,869                       | 51  |                         |          |           | 3.5t < GVW           | 19,083                       |
| 5   |                     |          | D         | 1W > 1.25t        | 988,354                      | 52  |                         |          | D         | GVW ≤ 2.5t           | 14,511                       |
| 6   |                     | Business | G         | –                 | 29,908                       | 53  |                         |          |           | 2.5t < GVW ≤ 3.5t    | 125,887                      |
| 7   |                     |          | D         | 1W ≤ 1.25t        | 109                          | 54  |                         |          |           | 3.5t < GVW ≤ 5.0t    | 183,660                      |
| 8   |                     |          | D         | 1W > 1.25t        | 6,342                        | 55  |                         |          |           | 5.0t < GVW ≤ 8.0t    | 838,205                      |
| 9   |                     |          | LPG       | –                 | 229,064                      | 56  |                         |          |           | 8.0t < GVW ≤ 12t     | 11,062                       |
| 10  | Bus                 | Private  | G         | 1.7t < GVW ≤ 2.5t | 183                          | 57  |                         |          |           | 12t < GVW ≤ 25t      | 133,933                      |
| 11  |                     |          |           | 2.5t < GVW ≤ 3.5t | 5,173                        | 58  |                         |          |           | 25t < GVW            | 4,892                        |
| 12  |                     |          |           | 3.5t < GVW        | 2,839                        | 59  |                         | Business | G         | GVW ≤ 1.7t           | 4                            |
| 13  |                     |          | D         | 1.7t < GVW ≤ 2.5t | 159                          | 60  |                         |          |           | 1.7t < GVW ≤ 2.5t    | 70                           |
| 14  |                     |          |           | 2.5t < GVW ≤ 3.5t | 11,543                       | 61  |                         |          |           | 2.5t < GVW ≤ 3.5t    | 3,762                        |
| 15  |                     |          |           | 3.5t < GVW ≤ 5.0t | 32,059                       | 62  |                         |          |           | 3.5t < GVW           | 20,108                       |
| 16  |                     |          |           | 5.0t < GVW ≤ 8.0t | 51,959                       | 63  |                         |          | D         | GVW ≤ 2.5t           | 93                           |
| 17  |                     |          |           | 8.0t < GVW ≤ 12t  | 10,746                       | 64  |                         |          |           | 2.5t < GVW ≤ 3.5t    | 3,222                        |
| 18  |                     | Business | G         | 12t < GVW         | 5,743                        | 65  |                         |          |           | 3.5t < GVW ≤ 5.0t    | 63,791                       |
| 19  |                     |          |           | 1.7t < GVW ≤ 2.5t | 10                           | 66  |                         |          |           | 5.0t < GVW ≤ 8.0t    | 360,008                      |
| 20  |                     |          |           | 2.5t < GVW ≤ 3.5t | 303                          | 67  |                         |          |           | 8.0t < GVW ≤ 12t     | 9,487                        |
| 21  |                     |          |           | 3.5t < GVW        | 1,154                        | 68  |                         |          |           | 12t < GVW ≤ 25t      | 318,786                      |
| 22  |                     |          | D         | 1.7t < GVW ≤ 2.5t | 2                            | 69  |                         |          |           | 25t < GVW            | 84,067                       |
| 23  |                     |          |           | 2.5t < GVW ≤ 3.5t | 932                          | 70  | Special Purpose Vehicle | Private  | G         | –                    | 149,027                      |
| 24  |                     |          |           | 3.5t < GVW ≤ 5.0t | 1,796                        | 71  |                         |          |           | GVW ≤ 1.7t           | 7,148                        |
| 25  |                     |          |           | 5.0t < GVW ≤ 8.0t | 16,920                       | 72  |                         |          |           | 1.7t < GVW ≤ 2.5t    | 38,911                       |
| 26  |                     |          |           | 8.0t < GVW ≤ 12t  | 21,433                       | 73  |                         |          |           | 2.5t < GVW ≤ 3.5t    | 106,463                      |
| 27  |                     |          |           | 12t < GVW         | 65,324                       | 74  |                         |          |           | 3.5t < GVW           | 10,323                       |
| 28  | Light Truck         | Private  | G         | –                 | 8,849,122                    | 75  |                         |          | D         | –                    | 24,543                       |
| 29  |                     | Business | G         | –                 | 321,561                      | 76  |                         |          |           | GVW ≤ 1.7t           | 4,479                        |
| 30  | Small Truck         | Private  | G         | GVW ≤ 1.7t        | 742,543                      | 77  |                         |          |           | 1.7t < GVW ≤ 2.5t    | 15,499                       |
| 31  |                     |          |           | 1.7t < GVW ≤ 2.5t | 661,320                      | 78  |                         |          |           | 2.5t < GVW ≤ 3.5t    | 102,555                      |
| 32  |                     |          |           | 2.5t < GVW ≤ 3.5t | 439,134                      | 79  |                         |          |           | 3.5t < GVW ≤ 5.0t    | 91,118                       |
| 33  |                     |          |           | 3.5t < GVW        | 5,515                        | 80  |                         |          |           | 5.0t < GVW ≤ 8.0t    | 286,917                      |
| 34  |                     |          | D         | GVW ≤ 1.7t        | 60,161                       | 81  |                         |          |           | 8.0t < GVW ≤ 12t     | 17,886                       |
| 35  |                     |          |           | 1.7t < GVW ≤ 2.5t | 281,843                      | 82  |                         | Business | G         | 12t < GVW            | 57,803                       |
| 36  |                     |          |           | 2.5t < GVW ≤ 3.5t | 850,984                      | 83  |                         |          |           | –                    | 11,648                       |
| 37  |                     |          |           | 3.5t < GVW ≤ 5.0t | 676,136                      | 84  |                         |          |           | GVW ≤ 1.7t           | 681                          |
| 38  |                     |          |           | 5.0t < GVW        | 112,786                      | 85  |                         |          |           | 1.7t < GVW ≤ 2.5t    | 3,076                        |
| 39  |                     | Business | G         | GVW ≤ 1.7t        | 5,235                        | 86  |                         |          |           | 2.5t < GVW ≤ 3.5t    | 4,040                        |
| 40  |                     |          |           | 1.7t < GVW ≤ 2.5t | 5,527                        | 87  |                         |          |           | 3.5t < GVW           | 4,430                        |
| 41  |                     |          |           | 2.5t < GVW ≤ 3.5t | 7,084                        | 88  |                         |          |           | –                    | 348                          |
| 42  |                     |          |           | 3.5t < GVW        | 413                          | 89  |                         |          | D         | GVW ≤ 1.7t           | 19                           |
| 43  |                     |          | D         | GVW ≤ 1.7t        | 716                          | 90  |                         |          |           | 1.7t < GVW ≤ 2.5t    | 591                          |
| 44  |                     |          |           | 1.7t < GVW ≤ 2.5t | 3,150                        | 91  |                         |          |           | 2.5t < GVW ≤ 3.5t    | 5,273                        |
| 45  |                     |          |           | 2.5t < GVW ≤ 3.5t | 19,304                       | 92  |                         |          |           | 3.5t < GVW ≤ 5.0t    | 9,379                        |
| 46  |                     |          |           | 3.5t < GVW ≤ 5.0t | 28,272                       | 93  |                         |          |           | 5.0t < GVW ≤ 8.0t    | 122,641                      |
| 47  |                     |          |           | 5.0t < GVW        | 6,731                        | 94  |                         |          |           | 8.0t < GVW ≤ 12t     | 4,353                        |
|     |                     |          |           |                   |                              | 95  |                         |          |           | 12t < GVW            | 109,115                      |
|     |                     |          |           |                   |                              | 96  | Motorcycle              | Private  | G         | Less than 50cc, 2st  | 3,511,593                    |
|     |                     |          |           |                   |                              | 97  |                         |          |           | Less than 50cc, 4st  | 4,019,079                    |
|     |                     |          |           |                   |                              | 98  |                         |          |           | Less than 125cc, 2st | 423,593                      |
|     |                     |          |           |                   |                              | 99  |                         |          |           | Less than 125cc, 4st | 1,087,847                    |
|     |                     |          |           |                   |                              | 100 |                         |          |           | Less than 250cc, 2st | 359,859                      |
|     |                     |          |           |                   |                              | 101 |                         |          |           | Less than 250cc, 4st | 1,633,080                    |
|     |                     |          |           |                   |                              | 102 |                         |          |           | Over 250cc, 2st      | 0                            |
|     |                     |          |           |                   |                              | 103 |                         |          |           | Over 250cc, 4st      | 1,524,176                    |

Fuel Type    G: Gasoline  
D: Diesel

#### S4. Remote sensing device (RSD) measurement

RSD is a device that measures the emissions of vehicles traveling on the road in real time with the configuration shown in Figure S4-1

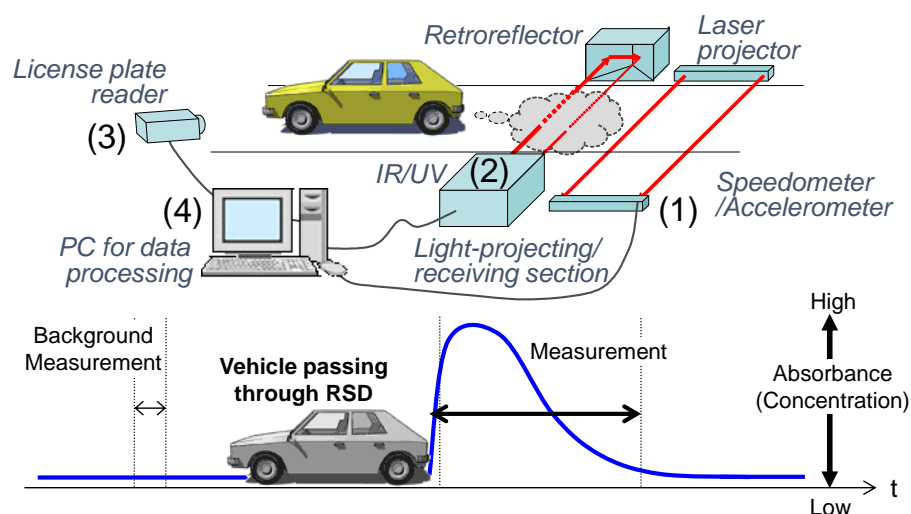

Figure S4-1 RSD On-road Set-up and Measurement

Table S4. JCAP/JATOP RSD measurement cases

| Period       | Place            | Sample | Valid data     |
|--------------|------------------|--------|----------------|
| Oct 2002     | Umi-no Koen Park | 30,225 | 19,111 (63.2%) |
| Feb-Mar 2004 | Umi-no Koen Park | 53,608 | 36,327 (67.8%) |
| Jul-Aug 2004 | Route No.4 Koga  | 66,296 | 17,649 (26.6%) |
| May-Jun 2006 | Umi-no Koen Park | 64,164 | 41,730 (65.0%) |
| Nov 2007     | Umi-no Koen Park | 59,417 | 27,233 (45.8%) |
| Feb 2008     | Nakane Rittai    | 71,872 | 47,225 (65.7%) |

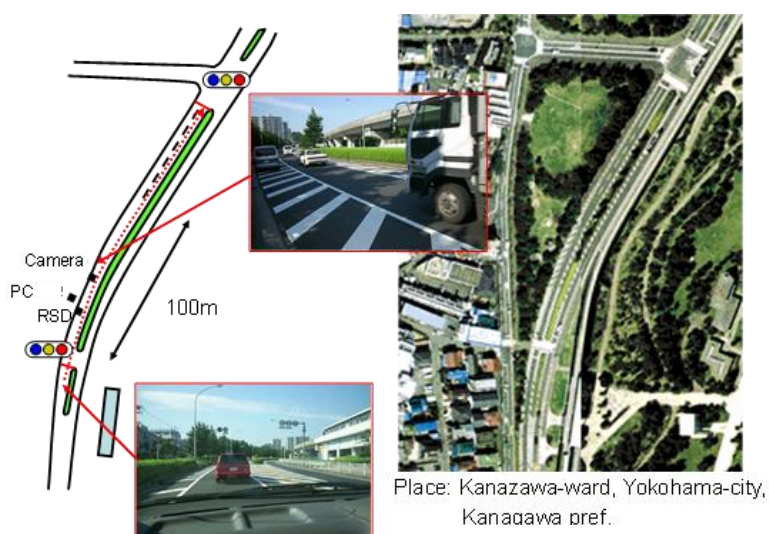

Figure S4-2. Umi-no-Koen Park

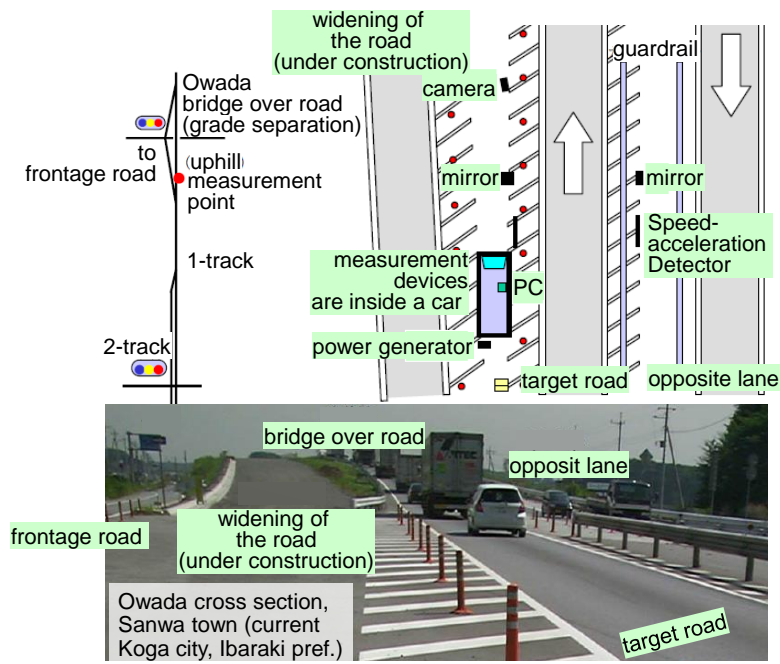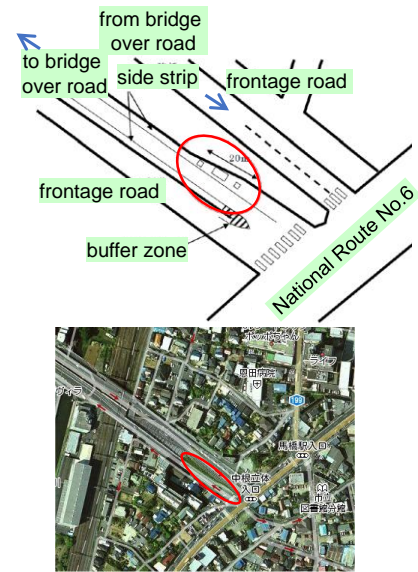

S5. Ship Emission

Figure S5 shows the ship emission of NOx. Emissions are applied based on the volume of vessel traffic on domestic and external routes. This inventory has been created by the National Maritime Research Institute’s original program\* SAPA-CTM, SAPA-MEET and SAPA-GIS.

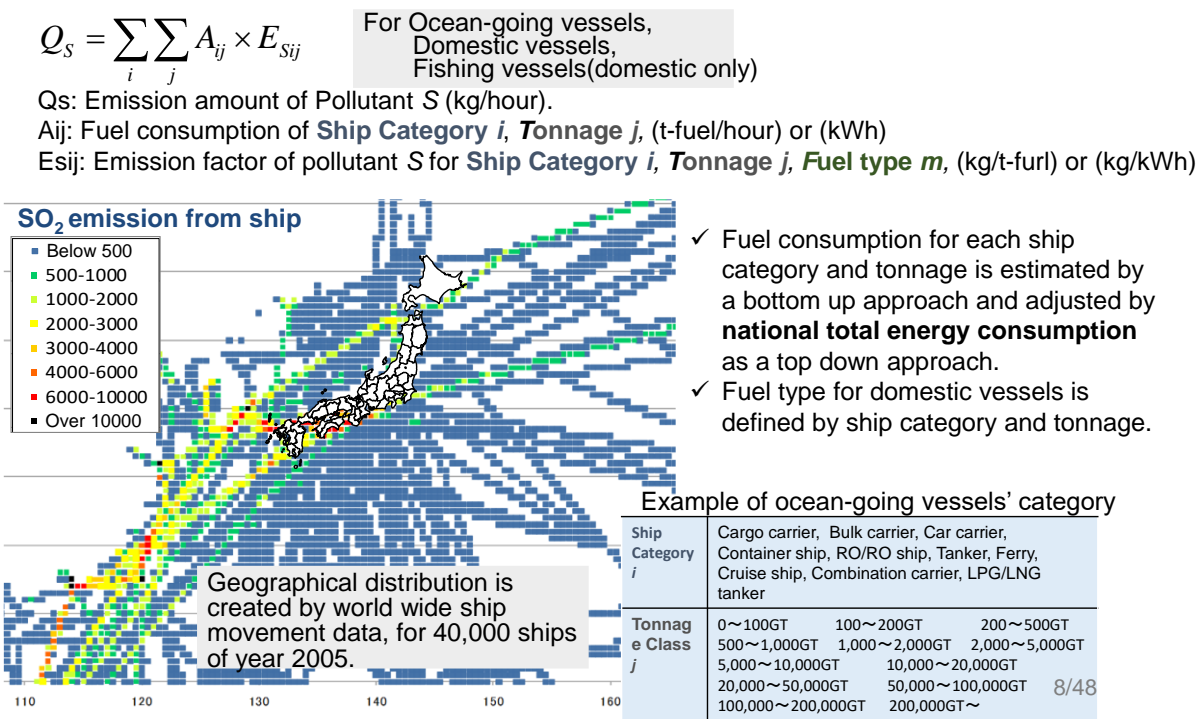

Figure S5. Overview of ship emission inventory estimation method and SO<sub>2</sub> emission results

\* Software Information Center, Japan, Program Registration number: PNo.9995-1 (2011.4.21)  
<https://www.softic.or.jp/touroku/list/list2011fh.html> (in Japanese) (accessed on 1 June 2021)

## S6. Secondary organic aerosol (SOA) model results

### 1) Concept

The secondary organic aerosol reaction is obtained as follows.

$$\Delta M0 = Y \cdot \Delta \text{ROG}$$

Where  $\Delta M0$  : Formed Aerosol Concentration

$Y$  : Aerosol Yield as a function of Aerosol Conc. (Decided based on Chamber Experiments)

$\Delta \text{ROG}$  : Reacted ROG Concentration

Aerosol yields for each ROG component are measured and modeled by smog chamber experiments.

Figure S6-1 and S6-2 show an outline of the chamber used.

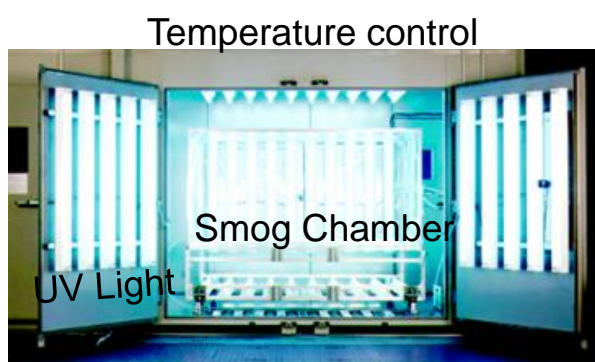

Figure S6-1. Smog chamber experiments

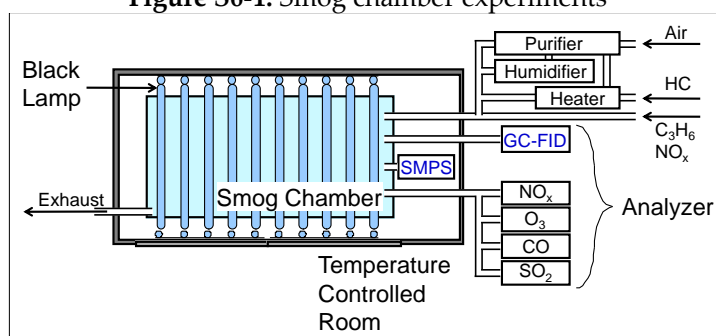

Figure S6-2. Outline of the chamber experiments

### 2) Modification of the Secondary Organic Aerosol Model

Based on the results of the photochemical chamber experiment, the secondary organic aerosol (SOA) formation model mounted on the air quality model (CMAQ) is modified and improved as below.

- We updated the reaction parameters when secondary organic compounds (SOA) are generated from plant-derived VOCs (only NO non-coexistence reactions peculiar to forests are extracted).
- A further pathway was added for the reaction product to react with OH. (Figure S6-3).

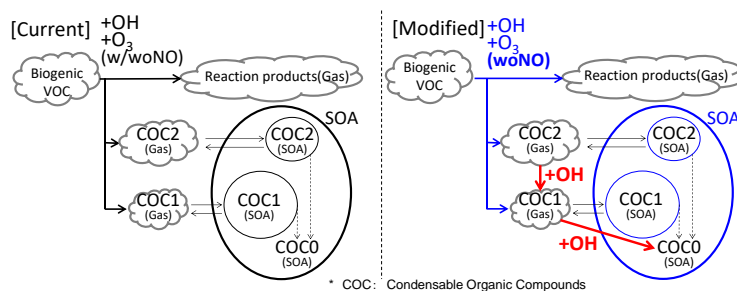

Figure S6-3. Reaction product pathway (Current and Modified)



Figure S6-4 shows comparison of SOA generation ability Y with default (SOA generation model with CMAQ)

- (1) Biogenic VOC reaction: High ability to generate SOA at OA concentration at the level of the actual atmosphere.
- (2) Product reaction process: The ability to generate SOA is further increased by adding a reaction pathway.

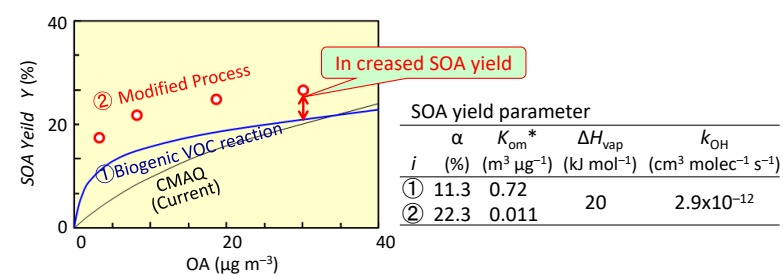

Figure S6-4. Comparison of SOA generation ability Y

Figure S6-5 shows the results of evaluating the reproducibility of OA concentration by incorporating the improved SOA model. Due to the improvement of the SOA generation model, the Biogenic SOA (BSOA) concentration increased by 50% on average annually. → Direction to improve the underestimation of OA. However, the difference from the observed values is large, and further research such as updating the SOA generation model and emission inventory is required.

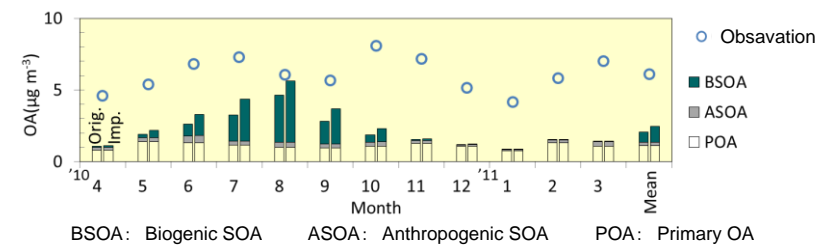

Figure S6-5. Results of OA reproducibility by the modified SOA model



## S7. Reproducibility of the JATOP III Urban Air Quality Model

In the JCAP/JATOP Urban Air Quality Model study, dispersion (NME), overestimation or underestimation (NMB), and Peak conc. (UPA, ozone only), which US EPA have defined, are used as evaluation indexes for concentration reproducibility.

Figure S7-1 shows the reproducibility of the JATOP III Urban Air Quality Model of PM<sub>2.5</sub> and ozone. The reproducibility of the weight concentration of PM<sub>2.5</sub> is good in both components, but the EC and OA of the component concentration are still at a level that cannot be said to be sufficient.

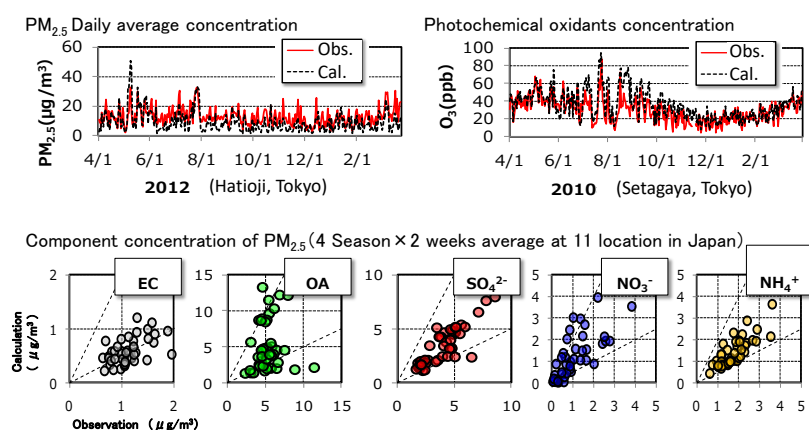

**Figure S7-1.** Reproducibility results of the JATOP III Urban Air Quality Model

Figure S7-2 shows the results of the evaluation index for each PM<sub>2.5</sub> component. Although the indicators have improved from JATOP II to JATOP III, the results are insufficient for EC and OA, and the reproducibility of each component is an issue for the future.

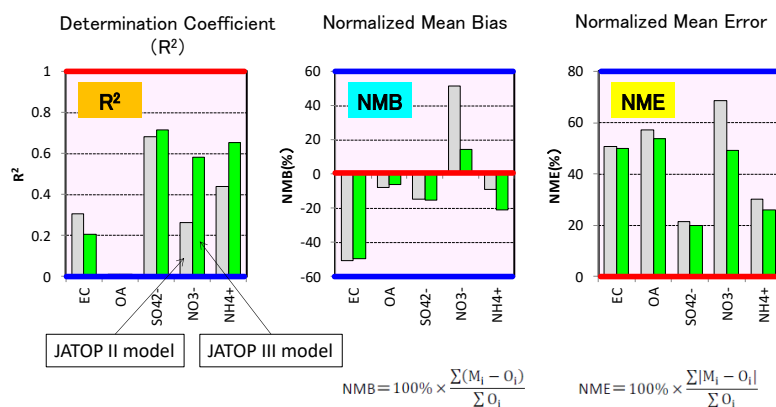

**Figure S7-2.** Evaluation index results for each PM<sub>2.5</sub> component

## S8. Transient Emission Inventory Model for the Roadside Air Quality Model

Figure S8-1 shows the calculation procedure of the Transient Emission Inventory Model.

A two-dimensional map of speed and driving force is created from emission test data from the chassis dynamometer. The JMEC 03 test cycle is used to measure emission.

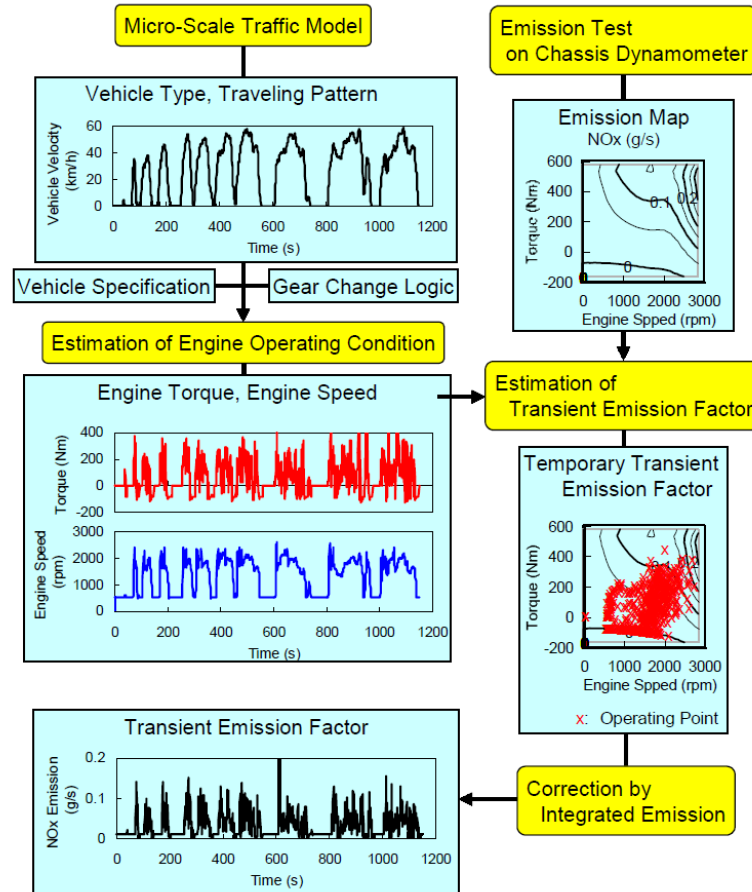

**Figure S8-1.** Calculation procedure of the Transient Emission Inventory

To incorporate the effect of road grade and load, driving force  $F$  is provided by the following equation.

$$F = (1 + \gamma) m \alpha + \mu mg + mg (\sin \theta) + \lambda A V^2$$

Where,  $\gamma$  : Inertia weight ratio

$\alpha$  : Vehicle Acceleration

$\mu$  : Rolling resistance coefficient

$m$  : Vehicle weight

$g$  : Acceleration of gravity

$\theta$  : Road grade

$\lambda$  : Air resistance coefficient

$A$  : Frontal projected area of vehicle

$V$  : Vehicle speed

A traffic flow model (Paramics®) calculates a temporal vehicle speed at each point on 10m mesh. From the transient emission map, the emission amount corresponding to the vehicle speed/acceleration for each point (10m mesh) is calculated.

Emission inventory is constructed by accumulating emissions from vehicles with all traffic volume per hour for each road point.

Figure S8-2 shows a comparison of emission test results with load and road grade varied to simulation results. This comparison shows the change of vehicle load and road grade. The results show generally good reproducibility of this model.

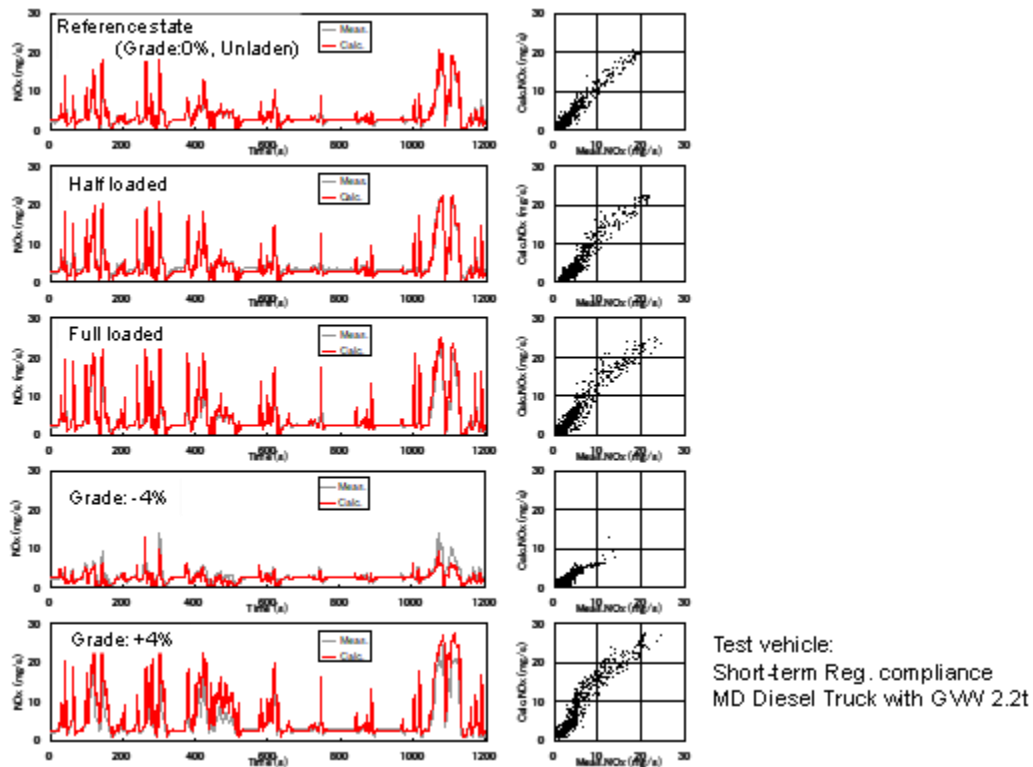

**Figure S8-2.** Comparison of emission test results with load and road grade

Emission inventory is constructed by accumulating emissions from vehicles with all traffic volume per hour for each road point. (Figure S8-3)

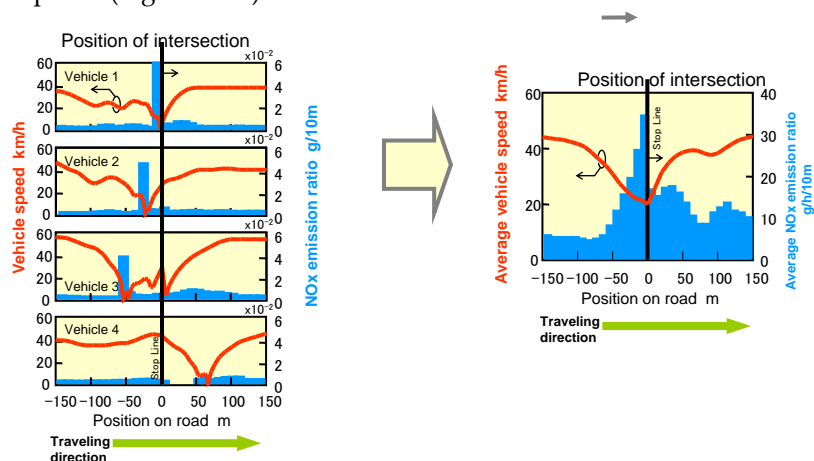

**Figure S8-3.** Transient emission inventory

## S9. Micro-scale Traffic Flow Model

“Paramics®” is used as the micro traffic flow model. Figure S9 shows the reproducibility results at the Kamiyama intersection. The reproducibility of vehicle traffic and vehicle velocity are generally good.

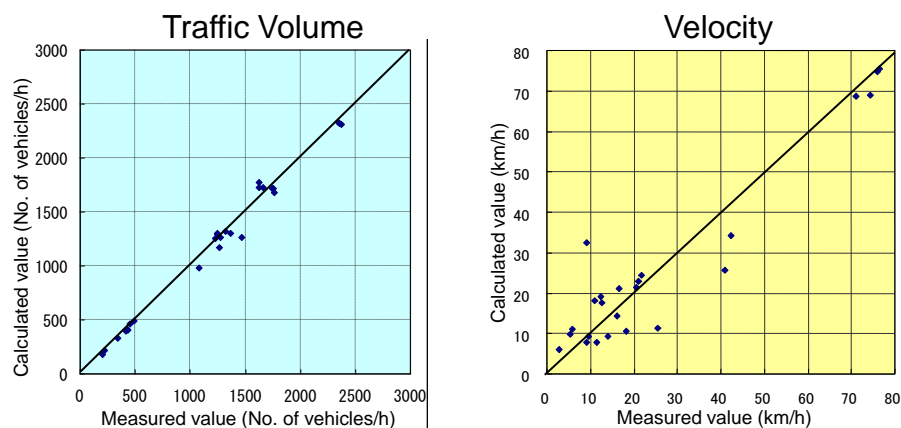

Reproducibility evaluation

| Item                  | Number of Links | Correlation coefficient | RMSE  |
|-----------------------|-----------------|-------------------------|-------|
| Link traffic volume   | 26 links        | 0.995                   | 5.7%  |
| Link average velocity | 22 links        | 0.947                   | 29.3% |

**Figure S9.** Reproducibility of micro traffic flow model, “Paramics®”.

# S10. Tracer gas analysis for the Roadside Air Quality Model (Yoshikawa, 2003a)

A concentration diffusion experiment with tracer gas has been performed to confirm reproducibility. Figure S10-1 shows the experimental conditions. Nine flow cases along the road are selected for measurement to confirm main canyon flow. SF<sub>6</sub> was used as the tracer gas. The experiment date was from February 29th to March 3rd, 2000.

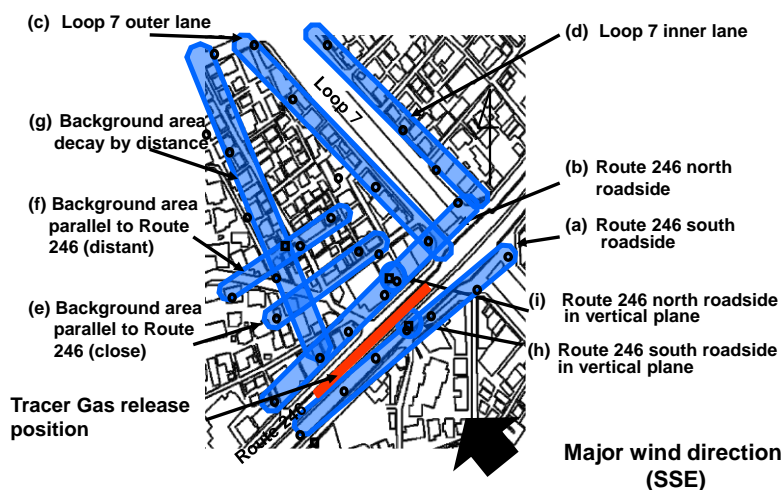

**Fig. S10-1.** Tracer gas flow measurement conditions. Small circles show tracer gas sampling points.

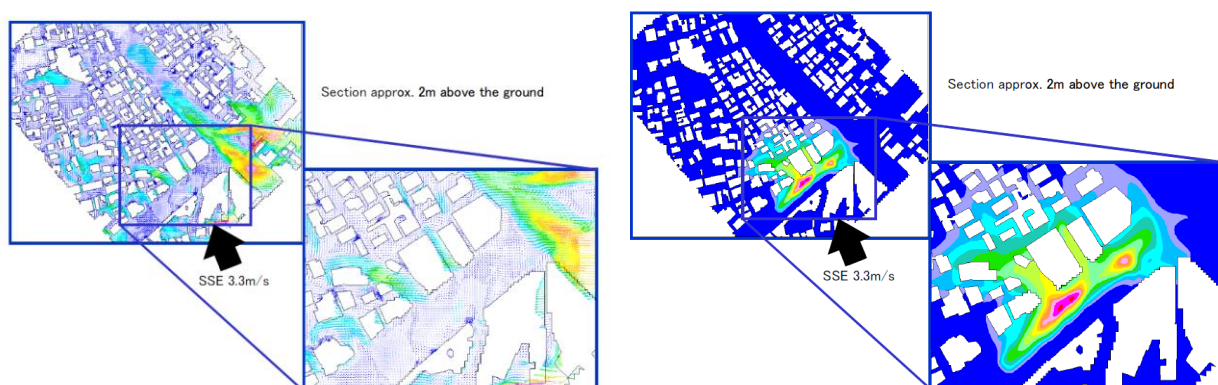

**Figure S10-2.** Calculated wind field (left) and tracer concentration field (right), section approx. 2m above the ground with the JCAP II Roadside Air Quality Model.

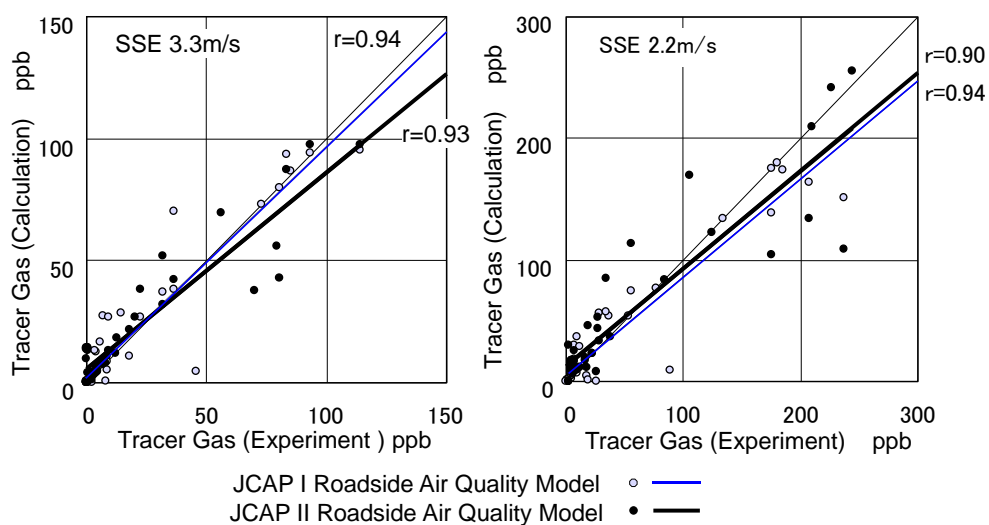

**Figure S10-3.** Correlation between experiment and calculation

**S11.** Changes in monthly average concentration of NO<sub>2</sub> at the five top Roadside Air Quality Monitoring Stations in Tokyo.

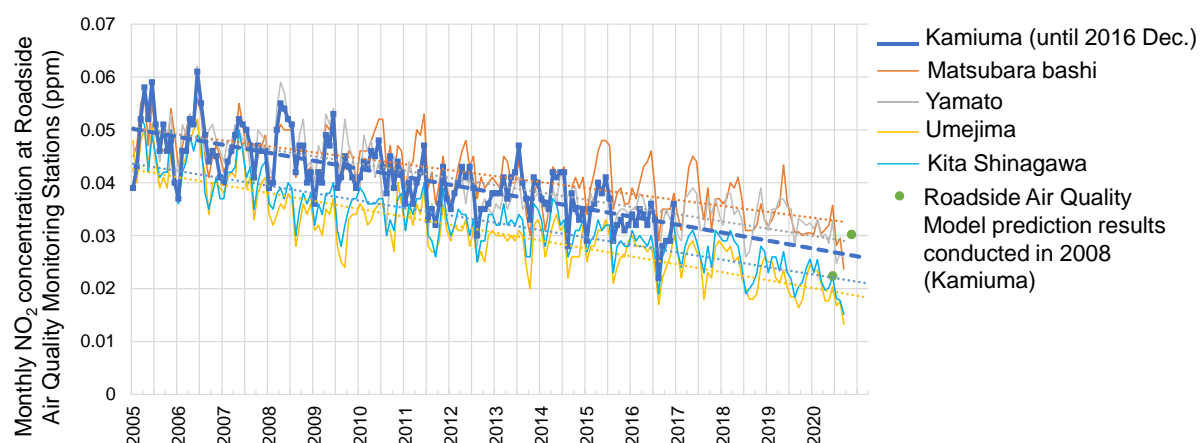

**Figure S11-1.** Changes in monthly average concentration of NO<sub>2</sub> at the five top Roadside Air Quality Monitoring Stations in Tokyo.

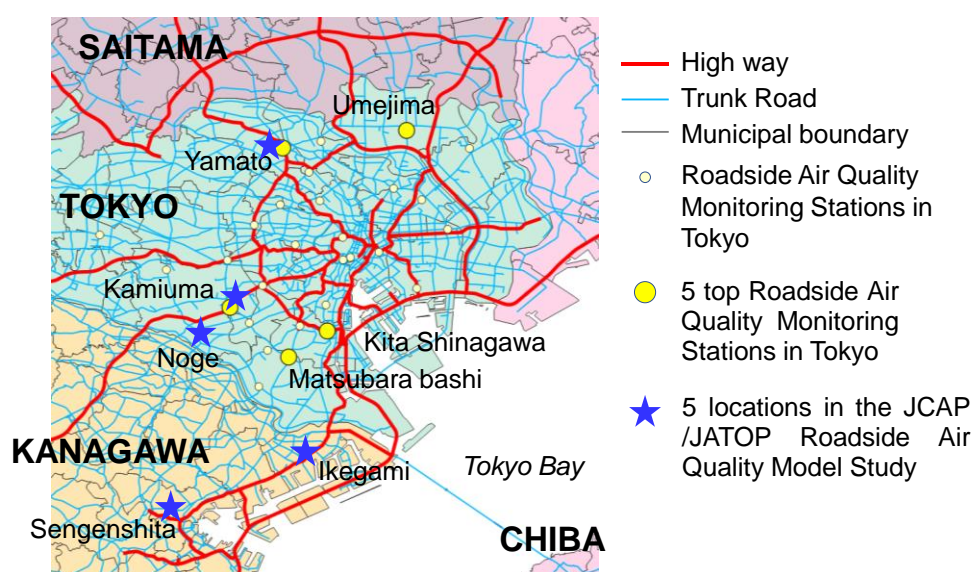

**Figure S11-2.** Locations of the five top Roadside Air Quality Monitoring Stations in Tokyo



## S12. PM and VOC profile from anthropogenic emissions

**Table S12-1** PM<sub>2.5</sub>/TSP and PM<sub>2.5</sub> profile for CMAQ aero6.

| No. | Industry / Activity / Source          | Fuel or Process                 | SPM/<br>TSP                | PM <sub>2.5</sub> /<br>TSP | Reference                                                              |                                                       |
|-----|---------------------------------------|---------------------------------|----------------------------|----------------------------|------------------------------------------------------------------------|-------------------------------------------------------|
| 1   | Manufacturing Industry                | Coke                            | 0.72                       | 0.54                       | speciate: Coke Calciner - Composite (ID: 91173) [S12-1]                |                                                       |
| 2   | Mining Industry                       | Coke                            | 0.90                       | 0.46                       |                                                                        |                                                       |
| 3   | Thermal Power Plant                   | Coal                            | 0.86                       | 0.70                       |                                                                        |                                                       |
| 4   | Manufacturing Industry                | Coal                            | 0.83                       | 0.62                       | speciate: Bituminous Combustion - Composite (ID: 91104) [S12-1]        |                                                       |
| 5   | Mining Industry                       | Coal                            | 0.94                       | 0.70                       |                                                                        |                                                       |
| 6   | Construction Industry                 | Coal                            | 0.83                       | 0.62                       |                                                                        |                                                       |
| 7   | Municipal Solid Waste                 |                                 | 0.80                       | 0.50                       | PM2.5EI, Municipal Solid Waste [S12-2]                                 |                                                       |
| 8   | Thermal Power Plant                   | Heavy Oil                       | 0.87                       | 0.72                       | PM2.5EI, Heavy Oil A Grade [S12-2]                                     |                                                       |
| 9   | Manufacturing Industry                | Heavy Oil, Grade B & C          | 0.83                       | 0.64                       |                                                                        |                                                       |
| 10  | Mining Industry                       | Heavy Oil, Grade C              | 0.96                       | 0.59                       |                                                                        |                                                       |
| 11  | Construction Industry                 | Heavy Oil, Grade C              | 0.93                       | 0.43                       | speciate: Coke Calciner - Composite (ID: 91173) [S12-1]                |                                                       |
| 12  | Fishing Industry                      | Heavy Oil, Grade C              | 0.95                       | 0.77                       |                                                                        |                                                       |
| 13  | Manufacturing Industry                | Oil Coke                        | 0.72                       | 0.54                       |                                                                        |                                                       |
| 14  | Manufacturing Industry                | Asphalt                         | 0.83                       | 0.64                       | PM2.5EI, Heavy Oil A Grade [S12-2]                                     |                                                       |
| 15  | Construction Industry                 | Heavy Oil, Grade A              | 0.89                       | 0.38                       | PM2.5EI, Heavy Oil A Grade [S12-2]                                     |                                                       |
| 16  | Manufacturing Industry                | Heavy Oil, Grade A              | 0.81                       | 0.70                       |                                                                        |                                                       |
| 17  | Agriculture and Forestry              | Heavy Oil, Grade A              | 0.94                       | 0.74                       |                                                                        |                                                       |
| 18  | Mining Industry                       | Heavy Oil, Grade A              | 0.92                       | 0.69                       |                                                                        |                                                       |
| 19  | Fishing Industry                      | Heavy Oil, Grade A              | 0.94                       | 0.74                       |                                                                        |                                                       |
| 20  | District heating                      | Heavy Oil                       | 0.95                       | 0.75                       |                                                                        |                                                       |
| 21  | Industrial Waste                      |                                 | 0.76                       | 0.43                       |                                                                        |                                                       |
| 22  | Manufacturing Industry                | Black Liquor                    | 0.87                       | 0.71                       |                                                                        |                                                       |
| 23  | Manufacturing Industry                | Wood Scrap                      | 0.86                       | 0.69                       | speciate: Wood Fired Boiler - inventory speciation (ID: 91114) [S12-1] |                                                       |
| 24  | Thermal Power Plant                   | Wood                            | 0.81                       | 0.61                       |                                                                        |                                                       |
| 25  | Manufacturing Industry                | Blast Furnace Gas               | 0.89                       | 0.75                       | PM2.5EI, City Gas [S12-2]                                              |                                                       |
| 26  | Thermal Power Plant                   | Blast Furnace Gas               | 0.90                       | 0.77                       |                                                                        |                                                       |
| 27  | Manufacturing Industry                | City Gas                        | 0.81                       | 0.61                       | PM2.5EI, City Gas [S12-2]                                              |                                                       |
| 28  | Thermal Power Plant                   | City Gas                        | 0.89                       | 0.76                       |                                                                        |                                                       |
| 29  | Construction Industry                 | City Gas                        | 0.87                       | 0.36                       |                                                                        |                                                       |
| 30  | District heating                      | City Gas                        | 0.96                       | 0.78                       |                                                                        |                                                       |
| 31  | Gasworks                              | City Gas                        | 0.84                       | 0.64                       |                                                                        |                                                       |
| 32  | Agriculture and Forestry              | City Gas                        | 0.89                       | 0.78                       |                                                                        |                                                       |
| 33  | Mining Industry                       | City Gas                        | 0.83                       | 0.63                       |                                                                        |                                                       |
| 34  | Fishing Industry                      | City Gas                        | 0.89                       | 0.78                       |                                                                        |                                                       |
| 35  | Manufacturing Industry                | Coke-oven Gas                   | 0.77                       | 0.56                       | PM2.5EI, City Gas [S12-2]                                              |                                                       |
| 36  | Thermal Power Plant                   | Coke-oven Gas                   | 0.88                       | 0.73                       | PM2.5EI, Heavy Oil A Grade [S12-2]                                     |                                                       |
| 37  | Manufacturing Industry                | Coal Tar                        | 0.78                       | 0.60                       |                                                                        |                                                       |
| 38  | Thermal Power Plant                   | Crude Oil                       | 0.87                       | 0.70                       | PM2.5EI, Heavy Oil A Grade [S12-2]                                     |                                                       |
| 39  | Manufacturing Industry                | Basic Oxygen Furnace Gas        | 0.81                       | 0.62                       | speciate: Steel Production - Basic Oxygen Furnace (ID: 283033) [S12-1] |                                                       |
| 40  | Thermal Power Plant                   | Basic Oxygen Furnace Gas        | 0.90                       | 0.74                       |                                                                        |                                                       |
| 41  | Manufacturing Industry                | Coal                            | 0.78                       | 0.57                       | speciate: Bituminous Combustion - Composite (ID: 91104) [S12-1]        |                                                       |
| 42  | Manufacturing Industry                | LPG                             | 0.77                       | 0.56                       | PM2.5EI, City Gas [S12-2]                                              |                                                       |
| 43  | Thermal Power Plant                   | LPG                             | 0.75                       | 0.58                       |                                                                        |                                                       |
| 44  | Agriculture and Forestry              | LPG                             | 0.89                       | 0.78                       |                                                                        |                                                       |
| 45  | Construction Industry                 | LPG                             | 0.95                       | 0.43                       |                                                                        |                                                       |
| 46  | Fishing Industry                      | LPG                             | 0.89                       | 0.78                       |                                                                        |                                                       |
| 47  | Mining Industry                       | LPG                             | 0.83                       | 0.63                       |                                                                        |                                                       |
| 48  | Manufacturing Industry                | Refinery Gas                    | 0.84                       | 0.66                       |                                                                        | speciate: Petroleum Industry -Avg (ID: 91145) [S12-1] |
| 49  | Manufacturing Industry                | Waste tire                      | 0.61                       | 0.40                       |                                                                        | speciate: Tire Burning (ID: 3283) [S12-1]             |
| 50  | Waste Disposal                        | Industrial waste                | 0.61                       | 0.40                       |                                                                        |                                                       |
| 51  | Agriculture and Forestry              | Kerosene Oil                    | 0.87                       | 0.39                       | speciate: Distillate Oil Combustion - Composite (ID: 91115) [S12-1]    |                                                       |
| 52  | Construction Industry                 | Kerosene Oil                    | 0.89                       | 0.41                       |                                                                        |                                                       |
| 53  | Manufacturing Industry                | Kerosene Oil                    | 0.77                       | 0.57                       |                                                                        |                                                       |
| 54  | District heating                      | Kerosene Oil                    | 0.95                       | 0.75                       |                                                                        |                                                       |
| 55  | Mining Industry                       | Kerosene Oil                    | 0.94                       | 0.78                       |                                                                        |                                                       |
| 56  | Fishing Industry                      | Kerosene Oil                    | 0.87                       | 0.39                       |                                                                        |                                                       |
| 57  | Manufacturing Industry                | LNG                             | 0.81                       | 0.61                       |                                                                        |                                                       |
| 58  | Manufacturing Industry                | Natural Gas                     | 0.81                       | 0.61                       | PM2.5EI, City Gas [S12-2]                                              |                                                       |
| 59  | Mining Industry                       | Natural Gas                     | 0.83                       | 0.63                       | speciate: Distillate Oil Combustion - Composite (ID: 91115) [S12-1]    |                                                       |
| 60  | Manufacturing Industry                | Jet Fuel                        | 0.77                       | 0.57                       |                                                                        |                                                       |
| 61  | District heating                      | RDF                             | 0.94                       | 0.78                       | PM2.5EI, Municipal Solid Waste [S12-2]                                 |                                                       |
| 62  | Mining Industry                       | Light Oil                       | 0.94                       | 0.78                       | speciate: Distillate Oil Combustion - Composite (ID: 91115) [S12-1]    |                                                       |
| 63  | Thermal Power Plant                   | Light Oil                       | 0.88                       | 0.73                       |                                                                        |                                                       |
| 64  | Fishing Industry                      | Light Oil                       | 0.92                       | 0.74                       | PM2.5EI, Heavy Oil A Grade [S12-2]                                     |                                                       |
| 65  | Manufacturing Industry                | Lubricant Oil                   | 0.83                       | 0.64                       |                                                                        |                                                       |
| 66  | Manufacturing Industry                | Gasoline                        | 0.86                       | 0.73                       | speciate: Distillate Oil Combustion - Composite (ID: 91115) [S12-1]    |                                                       |
| 67  | Manufacturing Industry                | Naphtha                         | 0.86                       | 0.73                       | speciate: Distillate Oil Combustion - Composite (ID: 91115) [S12-1]    |                                                       |
| 68  | Thermal Power Plant                   | NGL Condensate                  | 0.88                       | 0.74                       | PM2.5EI, City Gas [S12-2]                                              |                                                       |
| 69  | Manufacturing Industry                | NGL Condensate                  | 0.86                       | 0.73                       |                                                                        |                                                       |
| 70  | District heating                      | Recycled Oil                    | 0.96                       | 0.78                       | PM2.5EI, Heavy Oil A Grade [S12-2]                                     |                                                       |
| 71  | Manufacturing Industry                | Ultraheavy Oil, Paraffine Oil   | 0.78                       | 0.60                       | PM2.5EI, Heavy Oil A Grade [S12-2]                                     |                                                       |
| 72  | Iron and Steel industry               | Blast Furnace Steelmaker        | 0.57                       | 0.57                       | speciate 91179, 91139, 91133, 91173 [S12-1]                            |                                                       |
| 73  | Iron and Steel industry               | Other maker                     | 0.61                       | 0.61                       | speciate 91157, 91123, 91153 [S12-1]                                   |                                                       |
| 74  | Cement Industry                       |                                 | 0.58                       | 0.58                       | speciate: Cement Production - Composite (ID: 91127) [S12-1]            |                                                       |
| 75  | Residential                           | Kerosene Oil                    | 0.90                       | 0.78                       | speciate: Distillate Oil Combustion - Composite (ID: 91115) [S12-1]    |                                                       |
| 76  | Residential                           | LPG                             | 0.90                       | 0.78                       | PM2.5EI, City Gas [S12-2]                                              |                                                       |
| 77  | Residential                           | City Gas                        | 0.91                       | 0.77                       | PM2.5EI, City Gas [S12-2]                                              |                                                       |
| 78  | Commercial/Institutional              | Gasoline                        | 0.86                       | 0.73                       | speciate: Distillate Oil Combustion - Composite (ID: 91115) [S12-1]    |                                                       |
| 79  | Commercial/Institutional              | Jet Fuel                        | 0.90                       | 0.78                       | speciate: Distillate Oil Combustion - Composite (ID: 91115) [S12-1]    |                                                       |
| 80  | Commercial/Institutional              | Kerosene Oil                    | 0.90                       | 0.78                       | speciate: Distillate Oil Combustion - Composite (ID: 91115) [S12-1]    |                                                       |
| 81  | Commercial/Institutional              | Light Oil                       | 0.94                       | 0.76                       | speciate: Distillate Oil Combustion - Composite (ID: 91115) [S12-1]    |                                                       |
| 82  | Commercial/Institutional              | Heavy Oil, Grade A              | 0.85                       | 0.78                       | PM2.5EI, Heavy Oil A Grade [S12-2]                                     |                                                       |
| 83  | Commercial/Institutional              | Heavy Oil, Grade C              | 0.96                       | 0.78                       | PM2.5EI, Heavy Oil A Grade [S12-2]                                     |                                                       |
| 84  | Commercial/Institutional              | LPG                             | 0.90                       | 0.78                       | PM2.5EI, City Gas [S12-2]                                              |                                                       |
| 85  | Commercial/Institutional              | Coal                            | 0.94                       | 0.70                       | speciate: Bituminous Combustion - Composite (ID: 91104) [S12-1]        |                                                       |
| 86  | Commercial/Institutional              | Coke                            | 0.72                       | 0.54                       | speciate: Coke Calciner - Composite (ID: 91173) [S12-1]                |                                                       |
| 87  | Commercial/Institutional              | City Gas                        | 0.91                       | 0.78                       | PM2.5EI, City Gas [S12-2]                                              |                                                       |
| 88  | Field Burning of Agricultural Residue |                                 | 0.96                       | 0.90                       | speciate: Agricultural Burning - Composite (ID: 91103) [S12-1]         |                                                       |
| 89  | Cigarette Smoke                       |                                 | 1.00                       | 0.77                       | speciate: Draft Cigarette Smoke - Composite (ID: 91006) [S12-1]        |                                                       |
| 90  | Cooking                               | Homemade                        |                            | 0.82                       | speciate: Potato Deep Frying - Composite (ID: 91175) [S12-1]           |                                                       |
| 91  | Cooking                               | Food Services & Drinking Places |                            | 0.80                       |                                                                        |                                                       |
| 92  | Diesel Vehicle                        | Passenger Car                   | 1.00                       | 1.00                       | JATOP [S12-3]                                                          |                                                       |
| 93  | Diesel Vehicle                        | Van                             | 1.00                       | 1.00                       | JATOP [S12-3]                                                          |                                                       |
| 94  | Diesel Vehicle                        | Bus                             | 1.00                       | 1.00                       | JATOP [S12-3]                                                          |                                                       |
| 95  | Diesel Vehicle                        | Light Duty Truck                | 1.00                       | 1.00                       | JATOP [S12-3]                                                          |                                                       |
| 96  | Diesel Vehicle                        | Heavy Duty Truck                | 1.00                       | 1.00                       | JATOP [S12-3]                                                          |                                                       |
| 97  | Diesel Vehicle                        | Special Purpose Vehicle         | 1.00                       | 1.00                       | JATOP [S12-3]                                                          |                                                       |
| 98  | Gasoline Vehicle                      | Running                         | 1.00                       | 1.00                       | PM2.5EI, Gasoline Vehicle Exhaust Gas [S12-4]                          |                                                       |
| 99  | Gasoline Vehicle                      | Starting                        | 1.00                       | 1.00                       |                                                                        |                                                       |
| 100 | Tire Wear                             |                                 | PM <sub>2.5</sub> /SPM 0.4 |                            | speciate: Tire Dust - Composite (ID: 91150) [S12-1]                    |                                                       |
| 101 | Road Dust                             |                                 | PM <sub>2.5</sub> /SPM 0.2 |                            | speciate: Paved Road Dust - inventory speciation (ID: 91108) [S12-1]   |                                                       |
| 102 | Construction Machine                  | Diesel Engine                   | 0.91                       | 0.80                       | speciate: HDDV Exhaust - inventory speciation (ID: 91106) [S12-1]      |                                                       |
| 103 | Fork Lift & Agriculture Machine       | Diesel Engine                   | 0.91                       | 0.80                       | speciate: LDDV Exhaust - inventory speciation (ID: 91162) [S12-1]      |                                                       |
| 104 | Air Plane                             |                                 | 0.95                       | 0.89                       | speciate: Aircraft Exhaust (ID: 3861) [S12-1]                          |                                                       |
| 105 | Ship                                  |                                 | 1.00                       | 1.00                       | Ocean Policy Research Foundation [S12-5]                               |                                                       |

The part colored in pink indicates based on measurement data unique to Japan.



**Table S12-2** VOC profile from Combustion Sources expressed by SAPRC07 components.

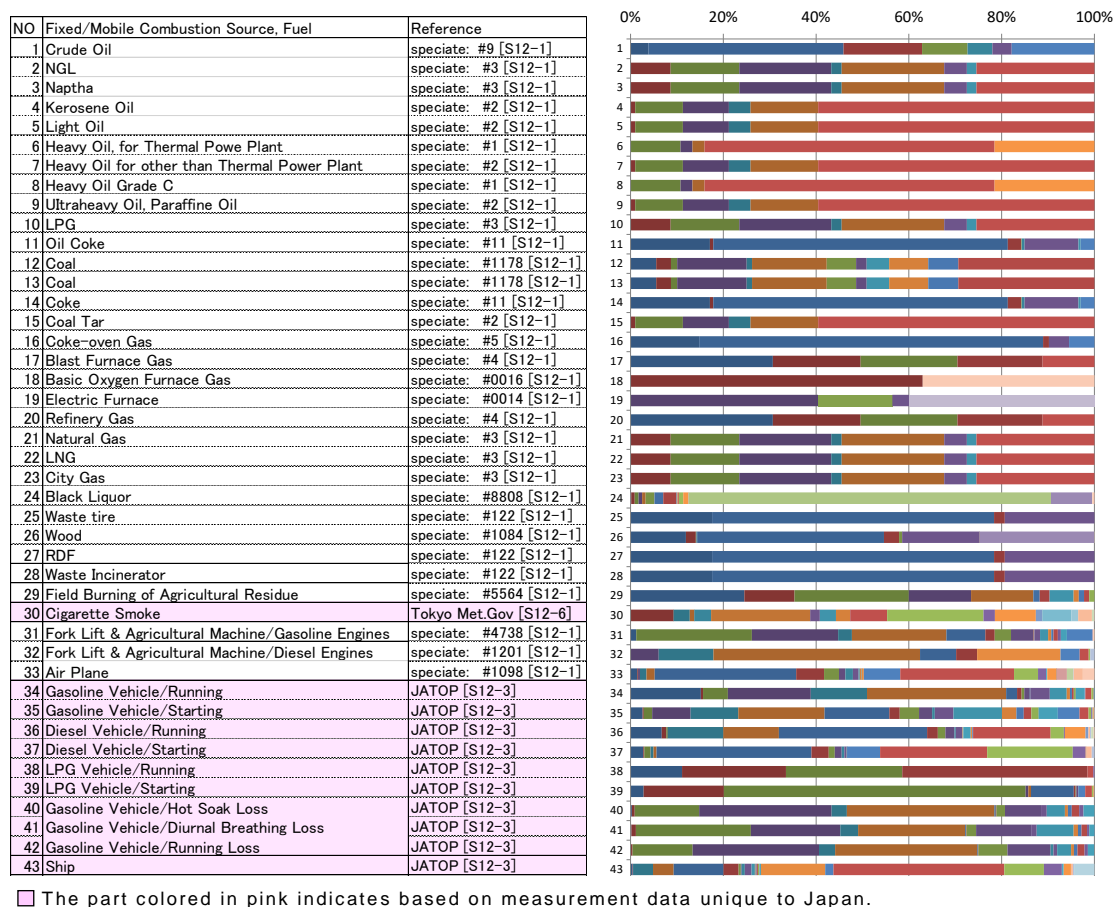

# SAPRC07 Components

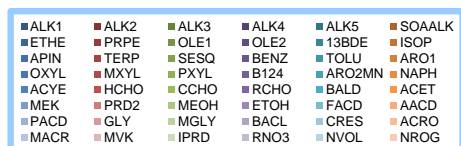

**Table S12-3** VOC profile from Evaporative Sources expressed by SAPRC07 components.

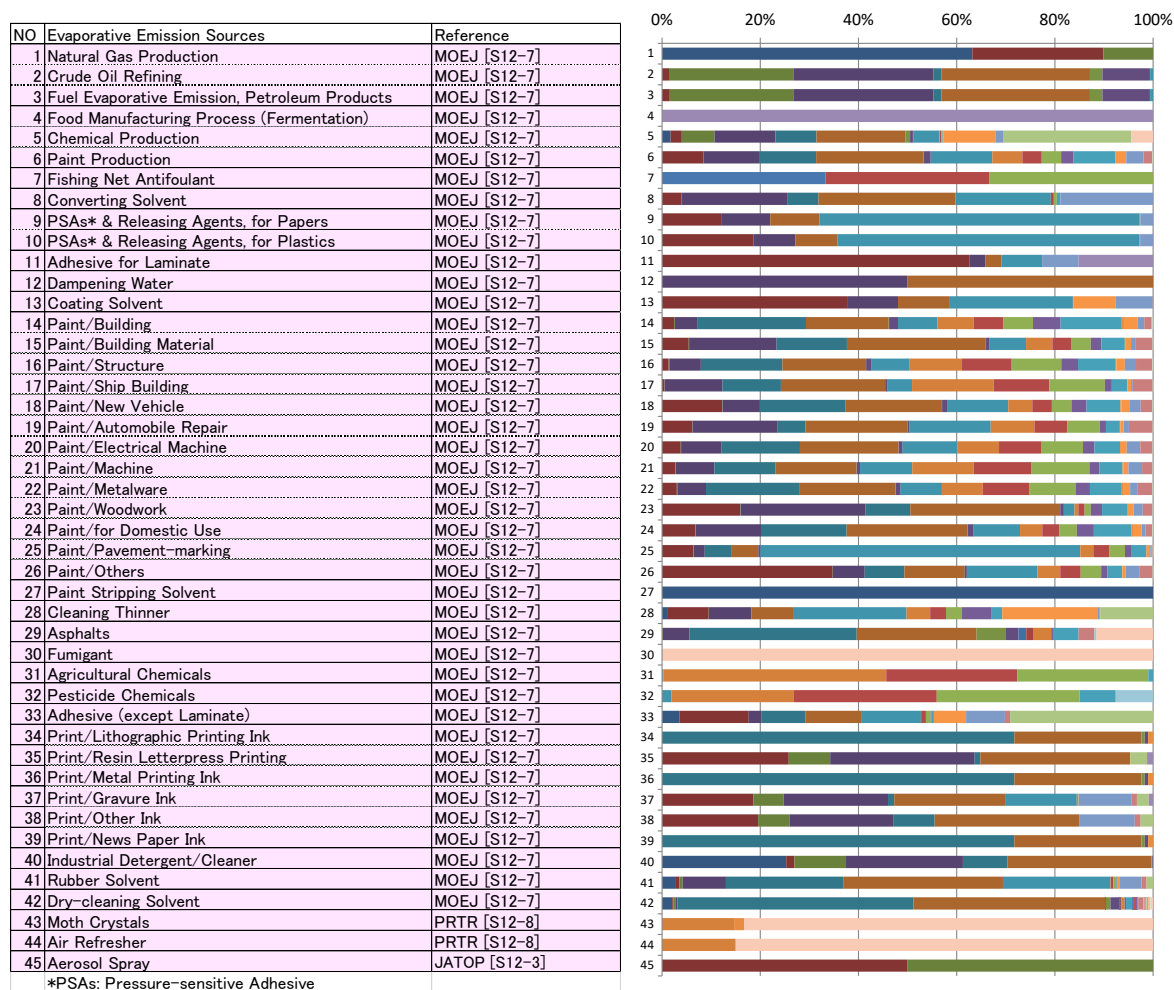

□ The part colored in pink indicates based on measurement data unique to Japan.

#### SAPRC07 Components

|      |      |      |      |        |        |
|------|------|------|------|--------|--------|
| ALK1 | ALK2 | ALK3 | ALK4 | ALK5   | SOAALK |
| ETHE | PRPE | OLE1 | OLE2 | 13BDE  | ISOP   |
| APIN | TERP | SEQ  | BENZ | TOLU   | ARO1   |
| OXYL | MXYL | PXYL | B124 | ARO2MN | NAPH   |
| ACYE | HCHO | CCHO | RCHO | BALD   | ACET   |
| MEK  | PRD2 | MEOH | ETOH | FACD   | AACD   |
| PACD | GLY  | MGLY | BACL | CRES   | ACRO   |
| MACR | MVK  | IPRD | RNO3 | NVOL   | NROG   |

#### Reference

S12-1. U.S. Environmental Protection Agency. SPECIATE version 4.4. **2014**, Available online: <https://www.epa.gov/air-emissions-modeling/speciate-4> (accessed on 1 June 2021)

S12-2. Japan Petroleum Energy Center. PM2.5 Emission Inventory and Source Profile. **2014**, pp.224. (in Japanese)

S12-3 Japan Petroleum Energy Center. PM2.5 Emission Inventory and Source Profile, Estimation Manual. **2015**, pp.1904. (in Japanese)

S12-4. Japan Petroleum Energy Center. PM2.5 Emission Inventory and Source Profile. **2017**, pp.289. (in Japanese)

S12-5. the Ocean Policy Research Foundation. Research report on the environmental impact of particulate matter (PM) of ship origin. **2007**, pp.341. (in Japanese)

S12-6 Bureau of Environment Tokyo Metropolitan Government and Tokyo Metropolitan Research Institute for Environmental Protection. Emission inventory report of fine particulate matter (PM<sub>2.5</sub>) etc., **2011**, pp.86. (in Japanese)

S12-7 Volatile Organic Compound Emission Inventory Study Group. Report on Volatile Organic Compound (VOC) Emission Inventory, **2007-present**, (in Japanese) Available online: <http://www.env.go.jp/air/osen/voc/inventory.html> (accessed on 1 June 2021)

S12-8 Ministry of the Environment, Environmental Health Department, Environmental Health and Safety Division, PRTR Data Page, **2001-present**, Available online: <http://www2.env.go.jp/chemi/prtr/prtrinfo/e-index.html> (accessed on 1 June 2021)
